# Supplementary material
Source: publisher site journal article supplement (https://www.dovepress.com/article/323095)
Supplement: Supplementary file 1 [file get_supplementary_file.php]

S Table 1. Sources of bacterial cultures used in the generation of standard curves for the determination of bacterial quantities.

S Table 2. Bacteria with innate resistance to antibiotics. X denotes innate resistance to the antibiotic(s) listed in the same column; these bacterial-antibiotic combinations were not included in the concordance analyses.

S Table 3. Distribution of bacteria detected in urine samples from urinary tract infection (UTI)-symptomatic patients. Gram-negative bacteria are listed in gray fonts and Gram-positive bacteria are listed in black and bold fonts.

S Table 4. Prevalence of the antibiotic resistance (ABR) genes detected in urine samples from 1,155 patients.

S Table 5. Prevalence of antibiotic resistance (ABR) genes in 372 patient urine samples with exclusively fastidious bacteria.

S Table 6. Detailed discordance results for meropenem, vancomycin, and piperacillin/tazobactam in monomicrobial and polymicrobial infections. Abbreviation: ABR, antibiotic resistance.

S Table 1

| **Bacterium** | **Vendor** | **Catalog number** |
| --- | --- | --- |
| *Acinetobacter baumannii* | Clinical isolate | N/a |
| *Actinotignum schaalii* | Clinical isolate | N/a |
| *Aerococcus urinae* | Clinical isolate | N/a |
| *Alloscardovia omnicolens* | Clinical isolate | N/a |
| *Citrobacter freundii* | Clinical isolate | N/a |
| *Citrobacter koseri* | Clinical isolate | N/a |
| *Corynebacterium riegelii* | Clinical isolate | N/a |
| *Enterococcus faecalis* | Clinical isolate | N/a |
| *Escherichia coli* | Clinical isolate | N/a |
| *Klebsiella aerogenes* | Clinical isolate | N/a |
| *Klebsiella oxytoca* | Clinical isolate | N/a |
| *Klebsiella pneumoniae* | Clinical isolate | N/a |
| *Morganella morganii* | Clinical isolate | N/a |
| *Mycoplasma genitalium* | ATCC | 49895 |
| *Mycoplasma hominis* | ATCC | 23114 |
| *Pantoea agglomerans* | ATCC | 27155 |
| *Proteus mirabilis* | Clinical isolate | N/a |
| *Providencia stuartii* | ATCC | 25827 |
| *Pseudomonas aeruginosa* | Clinical isolate | N/a |
| *Serratia marcescens* | Clinical isolate | N/a |
| *Staphylococcus aureus* | Clinical isolate | N/a |
| *Streptococcus agalactiae* | Clinical isolate | N/a |
| *Ureaplasma urealyticum* | ATCC | 27618 |
| Coagulase-negative staphylococci group (CoNS) |  |  |
| *Staphylococcus epidermidis* | ATCC | 12228 |
| *Staphylococcus haemolyticus* | ATCC | 29970 |
| *Staphylococcus lugdunesis* | ATCC | 49576 |
| *Staphylococcus saprophyticus* | ATCC | 15305 |
| Viridans group streptococci (VGS) |  |  |
| *Streptococcus anginosus* | ATCC | 33397 |
| *Streptococcus oralis* | ATCC | 35037 |
| *Streptococcus pasteuranus* | ATCC | 43144 |

S Table 2

|  | **Amoxicillin/**  **Clavulanate** | **Ampicillin** | **Ampicillin/ Sulbactam** | **Cefazolin** | **Cefoxitin** | **Ceftriaxone** | **Vancomycin** |
| --- | --- | --- | --- | --- | --- | --- | --- |
|
|
| *Acinetobacter baumannii* | X | X |  |  |  |  | X |
| *Citrobacter freundii* | X | X | X | X | X |  | X |
| *Citrobacter koseri* |  | X |  |  |  |  | X |
| *Escherichia coli* |  |  |  |  |  |  | X |
| *Klebsiella aerogenes* | X | X | X | X | X |  | X |
| *Klebsiella oxytoca* |  |  |  |  |  |  | X |
| *Klebsiella pneumoniae* |  | X |  |  |  |  | X |
| *Morganella morganii* |  | X | X | X |  |  | X |
| *Proteus mirabilis* |  |  |  |  |  |  | X |
| *Providencia stuartii* | X | X |  | X |  |  | X |
| *Pseudomonas aeruginosa* | X | X | X |  |  | X | X |
| *Serratia marcescens* | X | X | X | X | X |  | X |

S Table 3

| **Bacteria** | **N** | **%** |
| --- | --- | --- |
| *A. baumannii* | 2 | 0.17 |
| *C. freundii* | 1 | 0.09 |
| *C. koseri* | 9 | 0.78 |
| **CoNS** | **282** | **24.4** |
| *E. coli* | 564 | 48.8 |
| ***E. faecalis*** | **242** | **21** |
| *K. aerogenes* | 16 | 1.4 |
| *K. oxytoca* | 26 | 2.3 |
| *K. pneumoniae* | 145 | 12.6 |
| *M. morganii* | 22 | 1.9 |
| *P. aeruginosa* | 45 | 3.9 |
| *P. mirabilis* | 40 | 3.5 |
| *P. stuartii* | 1 | 0.1 |
| ***S. agalactiae*** | **99** | **8.6** |
| ***S. aureus*** | **21** | **1.8** |
| *S. marcescens* | 6 | 0.5 |

S Table 4

| **ABR genes** | **Number of patients** | **%** |
| --- | --- | --- |
| *CTX-M* group 1 | 47 | 4.1 |
| *CTX-M* group 2 | 6 | 0.5 |
| *CTX-M* group 8/25 | 1 | 0.1 |
| *CTX-M* group 9 | 14 | 1.2 |
| *DHA, MOX/CMY, BIL/LAT/CMY* | 32 | 2.8 |
| *KPC* | 1 | 0.1 |
| *OXA-1* | 21 | 1.8 |
| *OXA-40* | 2 | 0.2 |
| *OXA-48* | 1 | 0.1 |
| *QnrA* | 2 | 0.2 |
| *QnrB* | 3 | 0.3 |
| *SHV* | 100 | 8.7 |
| *TEM* | 205 | 17.7 |
| *VEB* | 7 | 0.6 |
| *VIM* | 1 | 0.1 |
| *AmpC, FOX, ACC* | 11 | 1 |
| *mecA* | 12 | 1 |
| *vanA1* | 1 | 0.1 |
| *vanA2* | 2 | 0.2 |
| *vanB* | 1 | 0.1 |

S Table 5

| **ABR genes** | **Number of patients** | **%** |
| --- | --- | --- |
| *CTX-M* group 2 | 1 | 0.3 |
| *DHA, MOX/CMY, BIL/LAT/CMY* | 6 | 1.6 |
| *KPC* | 1 | 0.3 |
| *OXA-1* | 3 | 0.8 |
| *QnrA* | 1 | 0.3 |
| *SHV* | 2 | 0.5 |
| *TEM* | 5 | 1.3 |
| *AmpC, FOX, ACC* | 4 | 1.1 |
| *vanA1* | 2 | 0.5 |
| *vanA2* | 3 | 0.8 |
| *vanB* | 1 | 0.3 |

S Table 6.

| **Antibiotics** | **Monomicrobial** | | | **Polymicrobial** | | |
| --- | --- | --- | --- | --- | --- | --- |
| **Number of patients** | **Sensitive, ABR genes present** | **Resistant, ABR genes absent** | **Number of patients** | **Sensitive, ABR genes present** | **Resistant, ABR genes absent** |
| Meropenem | 886 | 0.20% | 21.70% | 269 | 0.00% | 31.20% |
| Piperacillin/ Tazobactam | 886 | 29.20% | 3.40% | 269 | 43.50% | 2.20% |
| Vancomycin | 311 | 0.00% | 41.50% | 43 | 2.30% | 58.10% |
